# Supplementary material
Source: HighWire-hosted journal article supplement (http://www.jneurosci.org/highwire/filestream/599883/field_highwire_adjunct_files/0/fig_1.pdf)

**A**

**Amino acid sequences  
of Preso C-terminal variants**

Preso-WT            -KIKETTV  
 Preso- $\Delta$ C        -KIK  
 Preso-T1320D    -KIKEDTV

**B**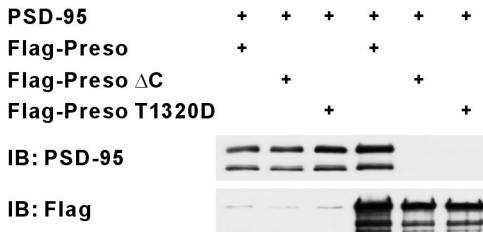**C**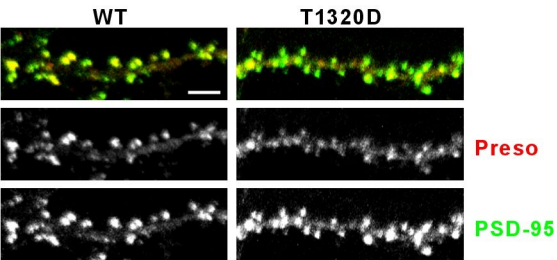**D**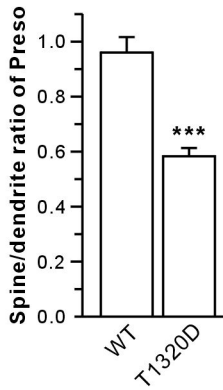

Supplement: fig_1.pdf [file fig_1.pdf]
